RESEARCH ARTICLE

# Gender, nutritional status and disability-free life expectancy among older people in Santiago, Chile

Ximena Moreno, Cecilia Albala\*, Lydia Lera, Bárbara Leyton, Bárbara Angel, Hugo Sánchez

Institute of Nutrition and Food Technology, University of Chile. ElLibano, Macul, Santiago, Chile

\* [calbala@uchile.cl](mailto:calbala@uchile.cl)

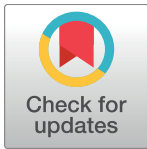

## Abstract

### Background

This study was aimed to estimate life expectancy (LE), disability-free life expectancy (DFLE) and disabled life expectancy (DLE) among older adults from Santiago, Chile, and to determine the existence of differences by gender and by body mass index (BMI) categories in these indicators.

### Methods

A sample of 1216 people aged 60 or more, from the Chilean cohort of the Study of Health, Ageing and Well-Being was recruited in 2000; two follow-up assessments were carried out in a 10-year period. Functional limitation was assessed through self-report of difficulties in activities of daily living, instrumental activities of daily living and mobility. BMI was determined with measured weight and height. Multistate life tables were employed to estimate LE and healthy life expectancy (HLE).

### Results

At 60 years, women could expect to live on average an additional 20.4 years (95% CI 19.0–21.6), and men an additional 16.4 years (95% CI 14.9–17.7). Total LE was longer among women at all ages, but they had a higher proportion of disabled years to be lived compared to men, with a difference of 14% at 60 years, and 10% at 90 years. There were no significant differences in LE, DFLE and DLE between BMI categories.

### Discussion

Despite a longer LE, Chilean older women expect to live a higher proportion of years with disabilities, compared to men. Public health programs should address factors affecting LE of older men, and those associated with disability among older women.

## OPEN ACCESS

**Citation:** Moreno X, Albala C, Lera L, Leyton B, Angel B, Sánchez H (2018) Gender, nutritional status and disability-free life expectancy among older people in Santiago, Chile. PLoS ONE 13(3): e0194074. <https://doi.org/10.1371/journal.pone.0194074>

**Editor:** Brecht Devleesschauwer, Scientific Institute of Public Health (WIV-ISP), BELGIUM

**Received:** July 19, 2017

**Accepted:** February 23, 2018

**Published:** March 28, 2018

**Copyright:** © 2018 Moreno et al. This is an open access article distributed under the terms of the [Creative Commons Attribution License](https://creativecommons.org/licenses/by/4.0/), which permits unrestricted use, distribution, and reproduction in any medium, provided the original author and source are credited.

**Data Availability Statement:** The data underlying this study belong to the National Archive of Computerized Data on Aging (NACDA) and are publicly available at the following link: <http://www.icpsr.umich.edu/icpsrweb/NACDA/studies/3546>. The authors did not have special access privileges.

**Funding:** This study was supported by the Chilean National Fund for Scientific and Technological Development (project Fondecyt 1080589, main investigator: Cecilia Albala). This funding institution played no role in the design, execution, analysis

and interpretation of the data, nor writing of the study.

**Competing interests:** The authors have declared that no competing interests exist.

**Abbreviations:** LE, Life Expectancies; DFLE, Disability-Free Life Expectancies; DLE, Disabled Life Expectancies; SABE, Study on Health, Well-being and Ageing; BMI, Body Mass Index; ADL, Activities of Daily Living; IADL, Instrumental Activities of Daily Living; MF, Mobility Function.

## Background

The ageing process exhibits particular features in Latin America and the Caribbean. As in many developing countries, a rapid transition from a young to an old age structure is occurring; however, unlike developed countries, this process is occurring at a high speed, with much less time to achieve the economic development needed to cover the demands of older adults on financial security, social protection, environmental support and health care [1]. There is considerable heterogeneity with respect to life expectancies (LE) in the region. In some countries LE at birth and at 60 years are comparable to European countries. The most remarkable case is Chile, where, in 2015, LE at birth was 80.5, and LE at 60 years was 24.4 [2]. Considering that older people in Chile can expect to live as long as older people from countries where the ageing process started earlier and developed at a slower pace, questions with respect to the quality of those years to be lived are raised.

Health expectancies are an important tool to assess the quantity and quality of years to be lived by specific groups of the population [3], allowing us to combine information on survival and health, instead of considering them in isolation [4]. Previous research on disability-free life expectancy (DFLE) has explored the gender health-survival paradox, consisting of a mortality advantage and disability disadvantage of women [5]. Research has shown that the gender gap varies, depending on structural indicators such as health expenditure or poverty risk of the country [6]. Factors related to lifestyle have also been proposed as a mechanism behind the gender gap in health expectancies, due to their differential distribution among men and women and their impact on morbidity and mortality [5,7]. Obesity is considered a risk factor for morbidity and mortality among the general population [8–10]. Numerous studies have reported that obesity increases the risk of developing disability [11–14]. Studies on the impact of obesity on LE and DFLE in older people, carried out in Europe and North America, have shown no impact of obesity on LE of older people, compared to those with a normal body mass index (BMI) [15–20], and a higher proportion of years expected to be lived with disabilities [15–18,21]. Similarly, two studies found that overweight women had a longer DLE [17,22], and two reported a longer LE among overweight participants [21,22].

Obesity and overweight are common among older people in Chile. In 2010, 42.6% of people aged 65 or more were overweight, and 31% were obese [23]; a recent Chilean study found that 40% of women and 28% of men aged 60 or more are obese [24]. The scale of the gender gap in LE and DFLE of Chilean elders, is unknown to date, and the impact of obesity and overweight on these indicators has not been studied. This study will determine if there is a difference in DFLE and DLE between older men and women and by BMI category in Santiago, Chile.

## Methods

We used data from the Health, Well-being and Ageing (SABE) study, carried out in seven large cities of Latin America and the Caribbean. Methodological details of this study have been described before [25–26]. The Chilean sample consisted of 1301 individuals living in the community in Santiago, born before 1940 and recruited in 1999–2000 through a probabilistic sampling process with a three-step procedure, considering districts, blocks and households. The results reported here are based on 1216 individuals who had complete baseline data on weight and height, in order to estimate their BMI. Excluded individuals had a higher prevalence of limitations in two or more instrumental activities of daily living, compared to those included in the analyses (32.5% vs. 18.7%,  $p = 0.002$ ). No other statistically significant difference on baseline socio-demographic characteristics or health status between both groups was observed.

The baseline assessment consisted of a home interview, carried out by trained interviewers and included weight and height measurements and questions on health and functional status.

Two follow-up measurements were carried out in 2004–2005 [27] and in 2009–2010 [28], including questions about functional status of participants. As observed in [S1 Fig](#), by the second interview, 225 participants had died, and 577 were interviewed. Of 991 participants still alive after the second assessment, 351 were interviewed, 236 had died and 404 were alive but their health status was unknown, at the end of the study follow-up. Participants who only had baseline information were younger than those who were followed-up ( $p < 0.001$ ), and had a higher prevalence of limitation in one or more activities of daily living (ADL) ( $p = 0.01$ ) and in two or more instrumental activities of daily living (IADL) ( $p = 0.04$ ), but the distribution by sex, BMI and functional status was similar between both groups.

Functional status was determined by self-report of the ability to perform ADL -including bathing, dressing, toileting, transferring, feeding and walking-; IADL -considering ability to handle finances, taking own medications, cooking, housekeeping and making phone calls-; and mobility function (MF)-assessed through the following activities and actions: vigorous activities such as lifting heavy objects, moderate activities such as sweeping, lifting groceries, climbing one set of stairs, climbing several sets of stairs, bending/kneeling/stooping, walking one block, walking several blocks, walking more than a mile, pulling or pushing large objects, lifting or carrying weights over 10 pounds, and extending arms above shoulder level. We defined functional limitation according to the criteria that Albala et al. [29] propose for the Chilean older population, namely limitation in at least one ADL, in two IADL, or in three MF questions. Weight and height measured at baseline were employed to determine BMI, using World Health Organization (WHO) BMI cut-offs points [30]: less than 18.5 as underweight, 18.5 to 24.9 as normal, 25 to 29.9 as overweight, and 30 or more as obesity. The vital status of all participants was determined at the end of follow-up. Mortality was ascertained through death certificates up to the end of 2010, which were obtained from the National Civil Registration Office.

To estimate LE, DFLE and DLE, we employed a multistate life tables approach. We used the Multi-State Markov and Hidden Markov Models in Continuous Time package (msm, version 1.6.4) for R (version 3.4.2), to estimate the transition intensity matrix [31]. With this package, a model can be fitted to longitudinal data with a mixture of arbitrary observation times, exact death times and censored states, and the effect of covariates can be explored [32]. LEs were estimated from the multi-state model with the “Estimation of Life Expectancies Using Continuous-Time Multi-State Survival Models” functions (ELECT, version 1.03) for R. A three-state model was fitted: state 1 was “healthy” (without functional decline), state 2 was “unhealthy” (with functional limitation), and state 3 was “dead”. Four transitions were possible: health to disability onset, disability to health, health to death and disability to death. Participants who were alive but in an unknown health status, by the end of follow-up, were right-censored. The multi-state models included age as a time-dependent variable, and sex and baseline BMI as covariates. LEs were estimated by gender and by BMI and gender; 95% confidence intervals were computed by simulation (1000 repetitions). Due to the low prevalence of underweight (1.6%), LEs for this category were not estimated.

This study was approved by the ethics committees of the Pan-American Health Organization and the Institute of Nutrition and Food Technology of the University of Chile. All participants signed an informed consent to take part in the study.

## Results

Baseline age, nutritional status according to BMI and functional status of the sample are depicted in [Table 1](#). The average age was 71.5 and ranged from 60 to 99. Among men and women, the most frequent BMI category was overweight, but obesity was more frequent among women. Baseline functional limitation was more frequent in women, who had a more than double prevalence of difficulties in IADL and mobility, compared to men.

**Table 1. Baseline characteristics of the sample .**

|                                    | Men<br>n = 410 | Women<br>n = 806 | P      |
|------------------------------------|----------------|------------------|--------|
| Age (mean, s.d.)                   | 70.6 (7.4)     | 71.9 (8.2)       | 0.004  |
| 60–69 years (%)                    | 56.6           | 49.3             | 0.003  |
| 70–79 years (%)                    | 32.9           | 33.2             |        |
| 80 or more (%)                     | 10.5           | 17.5             |        |
| Nutritional status (BMI)           |                |                  |        |
| Underweight (%)                    | 1.5            | 1.7              | 0.002  |
| Normal (%)                         | 30.5           | 25.3             |        |
| Overweight (%)                     | 45.1           | 39.3             |        |
| Obese (%)                          | 22.9           | 33.6             |        |
| Limitation in one or more ADL (%)  | 17.1           | 28.7             | <0.001 |
| Limitation in two or more IADL (%) | 10.0           | 23.1             | <0.001 |
| Limitation in three or more MF (%) | 18.1           | 43               | <0.001 |
| Functional limitation (%)          | 29.8           | 54.2             | <0.001 |

<https://doi.org/10.1371/journal.pone.0194074.t001>

Table 2 shows the Hazard Ratio of specific transitions, by age, gender and BMI. One additional year of age increased the risk of disability incidence (HR = 1.06, 95% CI 1.04–1.09) and mortality among disabled individuals (HR = 1.06, 95% CI 1.04–1.08). Women were more likely to become disabled (HR = 1.82, 95% CI 1.30–2.58) and less likely to die from the non-disabled state (HR = 0.15, 95% CI 0.02–0.90) and from the disabled state (HR = 0.64, 95% CI 0.49–0.83), compared to men.

As observed in Table 3, women had a longer LE at all ages compared to men. On average women at ages 60 and 70 could expect to live an additional 20.4 and 13.5 years, respectively. At ages 60 and 70, men could expect to live an additional 16.4 and 10.3 years, respectively. However, gender differences in the proportion of years to be lived with disabilities favoured men until very old ages (Fig 1). This difference was higher than 10% until 90 years of age. Differences in years expected to be lived free of disability were not statistically significant for any age. Table 4 shows LE, DFLE and DLE by nutritional status. In this case, no statistically significant differences in LE, DFLE and DLE by BMI category were observed.

## Discussion

The goal of this study was to determine the existence of a gender gap on DFLE and DLE of Chilean older men and women, and to explore the association of obesity and overweight with

**Table 2. Hazard ratios of disability incidence, recovery and mortality from specific health state, by age, gender and BMI (n = 1196).**

|                           | Age                  |           | Female<br>(Ref.: Male) |           | Overweight<br>(Ref.: Normal) |           | Obese<br>(Ref.: Normal) |           |
|---------------------------|----------------------|-----------|------------------------|-----------|------------------------------|-----------|-------------------------|-----------|
|                           | HR                   | 95% CI    | HR                     | 95% CI    | HR                           | 95% CI    | HR                      | 95% CI    |
|                           | Disability incidence | 1.06      | 1.04–1.09              | 1.82      | 1.30–2.58                    | 1.03      | 0.69–1.55               | 1.56      |
| Recovery                  | 0.97                 | 0.94–1.10 | 1.37                   | 0.79–2.38 | 0.74                         | 0.38–1.50 | 1.42                    | 0.68–2.95 |
| Mortality of non-disabled | 1.06                 | 0.99–1.12 | 0.15                   | 0.02–0.90 | 0.93                         | 0.40–2.20 | 0.10                    | 0.01–1.60 |
| Mortality of disabled     | 1.06                 | 1.04–1.08 | 0.64                   | 0.49–0.83 | 0.81                         | 0.61–1.10 | 0.91                    | 0.67–1.22 |

Hazard ratios from a multistate Markov model with continuous time, including age, sex and body mass index as covariates.

Ref.: Reference.

<https://doi.org/10.1371/journal.pone.0194074.t002>

**Table 3. Total life expectancy (LE), disability-free life expectancy (DFLE), disabled life expectancy (DLE), and percentage of years to be lived with disability (%disabled), for men and women (n = 1196).**

|            | Age 60    |           | Age 70   |           | Age 80  |         | Age 90  |         |
|------------|-----------|-----------|----------|-----------|---------|---------|---------|---------|
|            | Male      | Female    | Male     | Female    | Male    | Female  | Male    | Female  |
| Total LE   | 16.4      | 20.4      | 10.3     | 13.5      | 5.9     | 8.3     | 3.2     | 4.8     |
| 95% CI     | 14.9–17.7 | 19.0–21.6 | 9.4–11.3 | 12.5–14.5 | 5.1–6.7 | 7.5–9.2 | 2.5–3.9 | 4.0–5.6 |
| DFLE       | 10.2      | 9.9       | 5.2      | 4.9       | 2.2     | 2.1     | 0.8     | 0.1     |
| 95% CI     | 9.0–11.4  | 8.8–10.8  | 4.4–6.0  | 4.3–5.6   | 1.7–2.8 | 1.7–2.6 | 0.5–1.1 | 0.5–1.0 |
| DLE        | 6.3       | 10.6      | 5.1      | 8.6       | 3.7     | 6.2     | 2.4     | 4.1     |
| 95% CI     | 5.2–7.2   | 9.4–11.6  | 4.4–5.9  | 7.6–9.5   | 3.0–4.5 | 5.4–7.1 | 1.8–3.1 | 4.0–5.6 |
| % Disabled | 38.4      | 52.0      | 49.5     | 63.7      | 62.7    | 74.7    | 75.0    | 85.4    |

<https://doi.org/10.1371/journal.pone.0194074.t003>

DFLE and DLE. As expected, we found that total LE was longer among women, but that they also could expect to live a higher proportion of their remaining years of life with disabilities. With respect to nutritional status, no significant differences were found between BMI categories. Our results are in line with a significant number of studies in high income countries and in developing economies, which have shown a longer LE and a lower proportion of DFLE among women [4,5,7,33–39]. Previous studies suggest that a lower level of education increases the risk of disability, even at very old ages [40], and that women are more likely than men to have low levels of education [41–43]. In our own study, women were less educated ( $p < 0.001$ ), with an average of 5.2 years of education, compared to 6.5 years of education among men. Other mechanisms that could explain the higher burden of disability among older women include a higher prevalence of underlying conditions such as musculoskeletal disorders and fall-related fractures [44–47]. Consistent with this, the prevalence of osteoarthritis among Chilean older women has been estimated to exceed 40%, which is more than double that of men, independent of socioeconomic position [28]. Similarly, the prevalence of osteoporosis among women in our study was more than 5 times higher than among men (15.5% vs. 2.2%,  $p < 0.001$ ) and women also more frequently reported falls during the last year compared to men (39.7% vs. 22.7%,  $p < 0.001$ ).

We studied overweight and obesity as defined by BMI, considered as lifestyle factors that could have an effect on the gender health-survival paradox. Previous studies have found that overweight and obese older adults can expect to live more of their years with disabilities [15–18,21]. In these studies, a longer LE has been observed only among overweight elders [21,22], with no effect of obesity on this indicator. Our results provided no evidence to support either a negative or a positive effect of overweight or obesity on LE and DFLE. Although obese individuals born before 1940 in our cohort did not have a higher proportion of disabled life years, compared to non-obese participants, this situation might be different for those born after

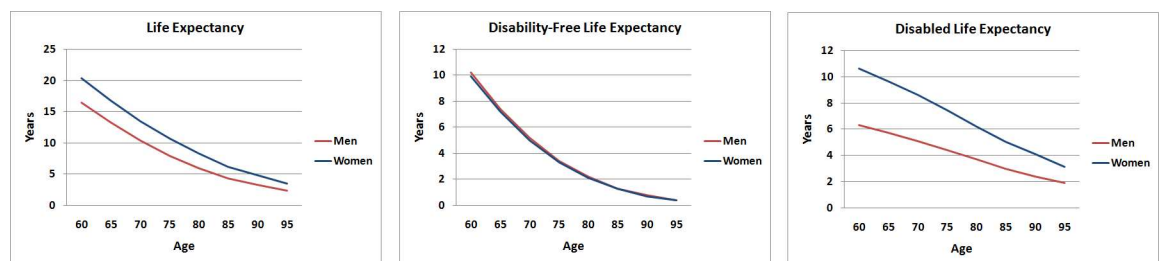

**Fig 1. Life expectancy, disability-free life expectancy and disabled life expectancy in men and women.**

<https://doi.org/10.1371/journal.pone.0194074.g001>

**Table 4. Total life expectancy (LE), disability-free life expectancy (DLFE), disabled life expectancy (DLE), and percentage of years to be lived with disability (% disabled), by nutritional status, for men and women (n = 1196).**

|              | BMI        | LE   | 95% CI    | DFLE | 95% CI   | DLE  | 95% CI   | % Disabled |
|--------------|------------|------|-----------|------|----------|------|----------|------------|
| <b>Men</b>   |            |      |           |      |          |      |          |            |
| Age 60       | Normal     | 15.5 | 12.8–18.1 | 9.3  | 6.5–12.5 | 6.2  | 4.1–8.6  | 40         |
|              | Overweight | 15.5 | 12.6–17.8 | 10.4 | 8.1–10.4 | 5.1  | 3.5–6.7  | 32.9       |
|              | Obese      | 16.5 | 0.2–22.6  | 10.3 | 0–14.5   | 6.3  | 0.1–10.3 | 38.2       |
| Age 70       | Normal     | 10.1 | 8.5–12.1  | 4.9  | 3.3–7.2  | 5.2  | 3.4–7.3  | 51.5       |
|              | Overweight | 10.3 | 8.7–12.1  | 5.9  | 4.6–7.5  | 4.4  | 3.2–5.9  | 42.7       |
|              | Obese      | 11.2 | 3.5–15.4  | 5.1  | 1.0–8.2  | 6.1  | 2.4–9.4  | 54.5       |
| Age 80       | Normal     | 6.5  | 4.9–8.5   | 2.5  | 1.4–4.7  | 4.0  | 2.0–5.9  | 61.5       |
|              | Overweight | 6.2  | 4.6–8.4   | 2.8  | 1.8–4.5  | 3.4  | 2.0–5.2  | 54.8       |
|              | Obese      | 7.2  | 3.6–11.6  | 2.3  | 0.6–4.8  | 4.9  | 2.4–8.9  | 68.1       |
| Age 90       | Normal     | 4.0  | 2.5–6.1   | 1.1  | 0.4–2.8  | 2.9  | 1.1–5.0  | 72.5       |
|              | Overweight | 3.5  | 2.0–5.6   | 1.1  | 0.4–2.6  | 2.4  | 1.0–4.5  | 68.6       |
|              | Obese      | 4.3  | 1.4–8.2   | 0.8  | 0–2.9    | 3.4  | 1.0–7.3  | 79.1       |
| <b>Women</b> |            |      |           |      |          |      |          |            |
| Age 60       | Normal     | 19.0 | 12.9–21.8 | 10.8 | 7.1–13.4 | 8.2  | 5.2–10.2 | 43.2       |
|              | Overweight | 20.9 | 18.1–22.9 | 9.2  | 7.4–10.8 | 11.7 | 9.7–13.6 | 56.0       |
|              | Obese      | 19.5 | 12.7–22.1 | 9.0  | 5.9–10.7 | 10.5 | 6.6–12.8 | 53.8       |
| Age 70       | Normal     | 12.7 | 10.8–14.4 | 5.8  | 4.5–7.2  | 6.9  | 5.5–8.4  | 54.3       |
|              | Overweight | 14.2 | 11.9–16.1 | 5.0  | 3.9–6.3  | 9.2  | 7.4–10.9 | 64.8       |
|              | Obese      | 13.1 | 10.9–15.1 | 4.1  | 3.1–5.5  | 9.0  | 7.1–10.8 | 68.7       |
| Age 80       | Normal     | 7.4  | 5.7–8.7   | 2.5  | 1.6–3.5  | 4.9  | 3.7–6.2  | 66.2       |
|              | Overweight | 8.6  | 6.3–10.5  | 2.3  | 1.4–3.5  | 6.3  | 4.6–8.0  | 73.3       |
|              | Obese      | 8.4  | 6.4–10.9  | 1.6  | 0.9–2.7  | 6.8  | 4.8–9.2  | 81.0       |
| Age 90       | Normal     | 4.0  | 2.7–5.4   | 1.0  | 0.4–1.8  | 3.0  | 2.0–4.4  | 75.0       |
|              | Overweight | 4.7  | 2.9–6.8   | 1.0  | 0.3–2.1  | 3.8  | 2.2–5.6  | 80.9       |
|              | Obese      | 5.1  | 3.2–7.2   | 0.6  | 0.1–1.4  | 4.5  | 2.7–6.7  | 88.2       |

<https://doi.org/10.1371/journal.pone.0194074.t004>

1940. A recent study found that cohorts of older adults born after 1940 could be more vulnerable to sarcopenic obesity, due to the important changes in lifestyle during the past three decades [24]. Elevated energy intake and physical inactivity are among the factors that increase the risk of developing this condition [48].

Our research has a number of strengths. First, our study is among the few published reports of DFLE estimates, from a prospective study, in older people in Latin America [49–52]. Secondly, in our study BMI was assessed by trained interviewers with standardized methods and equipment, minimizing measurement error. Furthermore, the sample was representative of older people living in the community in Santiago, the capital of Chile, and the methodological approach takes into account health transitions in our estimations. On the other hand, it is also important to consider some limitations. Although the sampling strategy allows us to extrapolate our results to the entire older population of the capital city, this is not the case for the rural population of Chile, where worse average living conditions and worse perceptions of health and quality of life exist, according to the National Study of Dependence among Older Adults [53]. Additionally, the sample size affected the precision of some estimations when stratified by BMI, particularly among obese men. These results should therefore be interpreted with caution. The use of BMI as a fixed covariate is a limitation of our analysis. Our approach is similar to most previous studies [15–22], and our assumption was that baseline BMI is associated to LE and DFLE. Nevertheless, our estimations are not expressing the effect of changes in BMI on LE and

DFLE. It is important to assess the impact of BMI trajectories on LE and DFLE among older people, considering the evidence that suggests that changes in BMI increase the risk of disability and mortality [38]. Finally, due to the lack of retrospective data, it was not possible to rule out that previous obesity could have negatively affected the health status of individuals who, due to these health problems, experienced a weight loss and were not obese at baseline. This could have biased the estimation of the impact of obesity on LE and DFLE. Also, we could not monitor the incidence of potentially disabling conditions, in order to estimate their distribution across BMI categories and to consider their effect on our estimations.

Future research on this topic could be strengthened by collecting and analyzing information on past and future weight. According to previous research [54], overweight and obesity during the life course have an impact on the risk of physical disability at old age. Other lifestyle factors that could have an effect on LE and DFLE should also be considered, such as smoking and exercise. Finally, weight loss and weight cycling increase the risk of disability and mortality among older people [55], and weight loss among obese older people is associated with incident multimorbidity [56].

In conclusion, this is the first study to report estimates of DFLE and DLE among Chilean older people. According to our results, in 2000, older women from Santiago had a longer LE, but could expect to live a higher proportion of these additional years with disabilities, when compared to men. Gender health inequalities should be addressed by public health programmes, considering factors affecting LE among older men, and those increasing the risk of disability among older women.

## Supporting information

**S1 Fig. Number of participants interviewed and vital status on each stage.**  
(TIF)

## Author Contributions

**Conceptualization:** Ximena Moreno, Cecilia Albala.

**Formal analysis:** Lydia Lera, Bárbara Leyton.

**Funding acquisition:** Cecilia Albala.

**Investigation:** Cecilia Albala.

**Methodology:** Ximena Moreno.

**Project administration:** Cecilia Albala, Hugo Sánchez.

**Supervision:** Bárbara Angel, Hugo Sánchez.

**Writing – original draft:** Ximena Moreno, Cecilia Albala.

**Writing – review & editing:** Lydia Lera, Bárbara Leyton, Bárbara Angel, Hugo Sánchez.

## References

1. UNFPA—Help International. Ageing in the Twenty-First Century A Celebration and A Challenge. [Internet]. 2012. Available from: [https://www.unfpa.org/sites/default/files/pub-pdf/Ageing\\_report.pdf](https://www.unfpa.org/sites/default/files/pub-pdf/Ageing_report.pdf). Accessed 23 April 2017.
2. WHO. Global health observatory data repository. Life expectancy data by country. 2017. Available from: <http://apps.who.int/gho/data/node.main.688>. Accessed 12 April 2017.
3. Jagger C, Matthews FE, Wohland P, Fouweather T, Stephan BCM, Robinson L, et al. A comparison of health expectancies over two decades in England: Results of the Cognitive Function and Ageing Study i

- and II. *Lancet*. 2016; 387(10020):779–86. [https://doi.org/10.1016/S0140-6736\(15\)00947-2](https://doi.org/10.1016/S0140-6736(15)00947-2) PMID: 26680218
4. Nusselder WJ, Looman CWN, van Oyen H, Robine JM, Jagger C. Gender differences in health of EU10 and EU15 populations: The double burden of EU10 men. *Eur J Ageing*. 2010; 7(4):219–27. <https://doi.org/10.1007/s10433-010-0169-x> PMID: 21212821
  5. Oksuzyan A, Brønnum-Hansen H, Jeune B. Gender gap in health expectancy. *European Journal of Ageing*. 2010; 7(4):213–8. <https://doi.org/10.1007/s10433-010-0170-4> PMID: 28798630
  6. Van Oyen H, Cox B, Jagger C, Cambois E, Nusselder W, Gilles C, et al. Gender gaps in life expectancy and expected years with activity limitations at age 50 in the European Union: Associations with macro-level structural indicators. *Eur J Ageing*. 2010; 7(4):229–37. <https://doi.org/10.1007/s10433-010-0172-2> PMID: 28798631
  7. Van Oyen H, Nusselder W, Jagger C, Kolip P, Cambois E, Robine JM. Gender differences in healthy life years within the EU: An exploration of the “health-survival” paradox. *Int J Public Health*. 2013; 58(1):143–55. <https://doi.org/10.1007/s00038-012-0361-1> PMID: 22618297
  8. Froehlich-Grobe K, Lollar D. Obesity and disability: Time to act. *Am J Prev Med*. 2011; 41(5):541–5. <https://doi.org/10.1016/j.amepre.2011.07.015> PMID: 22011427
  9. Aune D, Sen A, Prasad M, Norat T, Janszky I, Tonstad S, et al. BMI and all cause mortality: systematic review and non-linear dose-response meta-analysis of 230 cohort studies with 3.74 million deaths among 30.3 million participants. *BMJ*. 2016; May 4; 353:i2156. <https://doi.org/10.1136/bmj.i2156> PMID: 27146380
  10. Global BMI Mortality Collaboration E Di, Bhupathiraju SN, Wormser D, Gao P, Kaptoge S, Gonzalez AB de, et al. Body-mass index and all-cause mortality: individual-participant-data meta-analysis of 239 prospective studies in four continents. *Lancet (London, England)*. 2016; 388(10046):776–86.
  11. Villareal DT, Apovian CM, Kushner RF, Klein S. Obesity in older adults: Technical review and position statement of the American Society for Nutrition and NAASO, The Obesity Society. Vol. 82, *American Journal of Clinical Nutrition*. 2005. p. 923–34.
  12. Alley DE, Chang VW. The Changing Relationship of Obesity and Disability, 1988–2004. *JAMA*. 2007; 298(17):2020. <https://doi.org/10.1001/jama.298.17.2020> PMID: 17986695
  13. Chen H, Guo X. Obesity and functional disability in elderly Americans. *J Am Geriatr Soc*. 2008; 56(4):689–94. <https://doi.org/10.1111/j.1532-5415.2007.01624.x> PMID: 18266843
  14. Vincent HK, Vincent KR, Lamb KM. Obesity and mobility disability in the older adult. *Obesity Reviews*. 2010; 11: 568–79. <https://doi.org/10.1111/j.1467-789X.2009.00703.x> PMID: 20059707
  15. Reynolds SL, Saito Y, Crimmins EM. The impact of obesity on active life expectancy in older American men and women. *Gerontologist*. 2005; 45(4):438–44. PMID: 16051906
  16. Reynolds SL, McIlvane JM. The impact of obesity and arthritis on active life expectancy in older Americans. *Obesity (Silver Spring)*. 2009; 17(2):363–9.
  17. Reuser M, Bonneux LG, Willekens FJ. Smoking kills, obesity disables: A multistate approach of the US health and retirement survey. *Obesity*. 2009; 17(4):783–9. <https://doi.org/10.1038/oby.2008.640> PMID: 19165165
  18. Walter S, Kunst A, Mackenbach J, Hofman A, Tiemeier H. Mortality and disability: The effect of overweight and obesity. *Int J Obes*. 2009; 33(12):1410–8.
  19. Dhana K, Berghout MA, Peeters A, Ikram MA, Tiemeier H, Hofman A, et al. Obesity in older adults and life expectancy with and without cardiovascular disease. *Int J Obes*. 2016; 40(10):1535–40.
  20. Stenholm S, Head J, Aalto V, Kivimäki M, Kawachi I, Zins M, et al. Body mass index as a predictor of healthy and disease-free life expectancy between ages 50 and 75: A multicohort study. *Int J Obes*. 2017; 41(5):769–75.
  21. Majer IM, Nusselder WJ, Mackenbach JP, Kunst AE. Life expectancy and life expectancy with disability of normal weight, overweight, and obese smokers and nonsmokers in Europe. *Obesity (Silver Spring)*. 2011; 19(7):1451–9.
  22. Leigh L, Byles JE, Jagger C. BMI and healthy life expectancy in old and very old women. *Br J Nutr*. 2016; 116(4):692–9. <https://doi.org/10.1017/S0007114516002403> PMID: 27307012
  23. Ministry of Health. Encuesta Nacional de Salud ENS Chile 2009–2010 [National Health Survey NHS Chile 2009–2010]. 2010. Available from: <http://web.minsal.cl/portal/url/item/bcb03d7bc28b64dfe040010165012d23.pdf>. Accessed 21 April 2017.
  24. Lera L, Albala C, Sánchez H, Angel B, Hormazabal MJ, Márquez C, et al. Prevalence of sarcopenia in community-dwelling Chilean elders according to an adapted version of the European Working Group on Sarcopenia in Older People (EWGSOP) criteria. *J Frailty Aging*. 2017; 6(1):12–7. <https://doi.org/10.14283/jfa.2016.117> PMID: 28244552



25. Albala C., Lebrao ML, León Díaz EM, Ham-Chande R, Hennis AJ, Palloni A, et al. Encuesta Salud, Bienestar y Envejecimiento (SABE): metodología de la encuesta y perfil de la población estudiada [The Health, Well-Being, and Aging ("SABE") survey: methodology applied and profile of the study population]. *Rev Panam Salud Publica*. 2005; 17(5–6):307–22. PMID: [16053641](#)
26. Campos ACV, Albala C, Lera L, Sánchez H, Vargas AMD, Ferreira EF. Gender differences in predictors of self-rated health among older adults in Brazil and Chile. *BMC Public Health*. 2015; 15(1):365.
27. Arroyo P, Lera L, Sánchez H, Bunout D, Santos Luis J, Albala C. Indicadores antropométricos, composición corporal y limitaciones funcionales en ancianos [Anthropometry, body composition and functional limitations in the elderly]. *Rev Med Chil*. 2007; 135(7):846. <https://doi.org/S0034-98872007000700004> PMID: [17914541](#)
28. Albala C, Sánchez H, Lera L, Angel B, Cea X. Efecto sobre la salud de las desigualdades socioeconómicas en el adulto mayor. Resultados basales del estudio expectativa de vida saludable y discapacidad relacionada con la obesidad (Alexandros) [Socioeconomic inequalities in active life expectancy and disability related to obesity among older people]. *Rev Med Chil*. 2011; 139(10):1276–85. <https://doi.org/S0034-98872011001000005> PMID: [22286726](#)
29. Albala C, Lera L, García C, Arroyo P, Marín PP, Bunout D. Searching a Common Definition for Functional Limitation in Latin America. *Gerontologist*. 2004; 44: 550s.
30. WHO (1995) Physical status: the use and interpretation of anthropometry. Report of a WHO Expert Committee. WHO Technical Report Series 854. Geneva: World Health Organization, 1995. Available from: [http://apps.who.int/iris/bitstream/10665/37003/1/WHO\\_TRS\\_854.pdf](http://apps.who.int/iris/bitstream/10665/37003/1/WHO_TRS_854.pdf). Accessed 12 May 2017.
31. Jackson CH. Multi-State Models for Panel Data: The msm Package for R. *J Stat Softw*. 2011; 38(8):1–28.
32. Jackson C. Multi-state modelling with R: the msm package. Version 1.6.4. Cambridge, UK. 2016. Available from: <https://cran.r-project.org/web/packages/msm/vignettes/msm-manual.pdf>. Accessed 03 November 2017.
33. Camargos MCS, Machado CJ, DO Nascimento Rodrigues Disability life expectancy for the elderly, city of Sao Paulo, Brazil, 2000: gender and educational differences. *J Biosoc Sci*. 2007; 39(3):455–63. <https://doi.org/10.1017/S0021932006001428> PMID: [16707040](#)
34. Belon A, G Lima M, BA Barros M. Gender differences in healthy life expectancy among Brazilian elderly. *Health Qual Life Outcomes*. 2014; 12(1):88.
35. Pongiglione B, De Stavola BL, Ploubidis GB. A systematic literature review of studies analyzing inequalities in health expectancy among the older population. *PLoS One*. 2015 Jun 26; 10(6):e0130747. <https://doi.org/10.1371/journal.pone.0130747> PMID: [26115099](#)
36. Apinonkul B, Soonthorndhada K, Vapattanawong P, Jagger C, Aekplakorn W. Regional and gender differences in years with and without mobility limitation in the older population of Thailand. *PLoS ONE*. 2016; 11(5):e0153763. <https://doi.org/10.1371/journal.pone.0153763> PMID: [27138811](#)
37. Santosa A, Schröders J, Vaezghasemi M, Ng N. Inequality in disability-free life expectancies among older men and women in six countries with developing economies. *J Epidemiol Community Health*. 2016; 70(9):855–61. <https://doi.org/10.1136/jech-2015-206640> PMID: [26994068](#)
38. Drumond Andrade FC, Mohd Nazan AIN, Lebrão ML, De Oliveira Duarte YA. The impact of body mass index and weight changes on disability transitions and mortality in Brazilian older adults. *J Aging Res*. 2013; 2013: 905094. <https://doi.org/10.1155/2013/905094> PMID: [23691319](#)
39. Freedman VA, Wolf DA, Spillman BC. Disability-free life expectancy over 30 years: A growing female disadvantage in the US population. *Am J Public Health*. 2016; 106(6):1079–85. <https://doi.org/10.2105/AJPH.2016.303089> PMID: [26985619](#)
40. Kingston A, Davies K, Collerton J, Robinson L, Duncan R, Kirkwood TBL, et al. The enduring effect of education-socioeconomic differences in disability trajectories from age 85 years in the Newcastle 85+ Study. *Arch Gerontol Geriatr*. 2015; 60(3):405–11. <https://doi.org/10.1016/j.archger.2015.02.006> PMID: [25747850](#)
41. Hoogendijk E, Groenou MB, Tilburg T, Deeg D. Educational differences in functional limitations: Comparisons of 55–65-year-olds in the Netherlands in 1992 and 2002. *Int J Public Health*. 2008; 53(6):281–9. <https://doi.org/10.1007/s00038-008-8079-9> PMID: [19112590](#)
42. Hosseinpoor AR, Williams JS, Jann B, Kowal P, Officer A, Posarac A, et al. Social determinants of sex differences in disability among older adults: a multi-country decomposition analysis using the World Health Survey. *Int J Equity Heal*. 2012; 11:52.
43. Solé-Auró A, Alcañiz M. Educational attainment, gender and health inequalities among older adults in Catalonia (Spain). *Int J Equity Health*. 2016; 15(1):126. <https://doi.org/10.1186/s12939-016-0414-9> PMID: [27491677](#)

44. Murtagh KN, Hubert HB. Gender differences in physical disability among an elderly cohort. *Am J Public Health*. 2004; 94(8):1406–11. PMID: [15284051](#)
45. Stevens JA, Sogolow E. Gender differences for non-fatal unintentional fall related injuries among older adults. *Inj Prev*. 2005; 11(2):115–9. <https://doi.org/10.1136/ip.2004.005835> PMID: [15805442](#)
46. Leveille SG, Zhang Y, McMullen W, Kelly-Hayes M, Felson DT. Sex differences in musculoskeletal pain in older adults. *Pain*. 2005; 116(3):332–8. <https://doi.org/10.1016/j.pain.2005.05.002> PMID: [15982814](#)
47. Morrison A, Fan T, Sen SS, Weisenfluh L. Epidemiology of falls and osteoporotic fractures: a systematic review. *Clin Outcomes Res*. 2013; 5:9–18.
48. Stenholm S, Harris T, Rantanen T, Visser M, Kritchevsky SB, Ferrucci L. Sarcopenic obesity-definition, etiology and consequences. *Curr Opin Clin Nutr Metab Care*. 2008; 11(6):693–700. <https://doi.org/10.1097/MCO.0b013e328312c37d> PMID: [18827572](#)
49. Drumond Andrade FC, Guevara PE, Lebrão ML, de Oliveira Duarte YA, Santos JLF. Gender differences in life expectancy and disability-free life expectancy among older adults in São Paulo, Brazil. *Womens Health Issues*. 2011; 21(1):64–70. <https://doi.org/10.1016/j.whi.2010.08.007> PMID: [21185991](#)
50. Andrade FC. Measuring the impact of diabetes on life expectancy and disability-free life expectancy among older adults in Mexico. *J Gerontol B Psychol Sci Soc Sci*. 2010; 65B(3):381–9. <https://doi.org/10.1093/geronb/gbp119> PMID: [20028950](#)
51. Beltrán-Sánchez H, Andrade FC. Educational and sex differentials in life expectancies and disability-free life expectancies in São Paulo, Brazil, and urban areas in Mexico. *J Aging Health*. 2013 Aug; 25(5):815–38. <https://doi.org/10.1177/0898264313491425> PMID: [23781016](#)
52. Payne CF. Aging in the Americas: Disability-free Life Expectancy Among Adults Aged 65 and Older in the United States, Costa Rica, Mexico, and Puerto Rico. *J Gerontol B Psychol Sci Soc Sci*. 2015 Sep 7. pii: gbv076.
53. Albala C, Sanchez H, Fuentes A, Lera L, Cea X, Salas F, et al. Estudio Nacional de la Dependencia en las Personas Mayores (National Survey of Dependence among Older Adults). 2010. Available from: [http://www.senama.cl/filesapp/Estudio\\_dependencia.pdf](http://www.senama.cl/filesapp/Estudio_dependencia.pdf). Accessed 18 May 2017.
54. Houston DK, Ding J, Nicklas BJ, Harris TB, Lee JS, Nevitt MC, et al. Overweight and obesity over the adult life course and incident mobility limitation in older adults: The health, aging and body composition study. *Am J Epidemiol*. 2009; 169(8):927–36. <https://doi.org/10.1093/aje/kwp007> PMID: [19270048](#)
55. Murphy RA, Patel K V., Kritchevsky SB, Houston DK, Newman AB, Koster A, et al. Weight change, body composition, and risk of mobility disability and mortality in older adults: A population-based cohort study. *J Am Geriatr Soc*. 2014; 62(8):1476–83. <https://doi.org/10.1111/jgs.12954> PMID: [25039391](#)
56. Fabbri E, Tanaka T, An Y, Zoli M, Bandinelli S, Guralnik JM, et al. Loss of weight in obese older adults: A biomarker of impending expansion of multimorbidity? *J Am Geriatr Soc*. 2015; 63(9):1791–7. <https://doi.org/10.1111/jgs.13608> PMID: [26311068](#)
